# Supplementary material
Source: PubMed Central journal article supplement (PMC1242299)

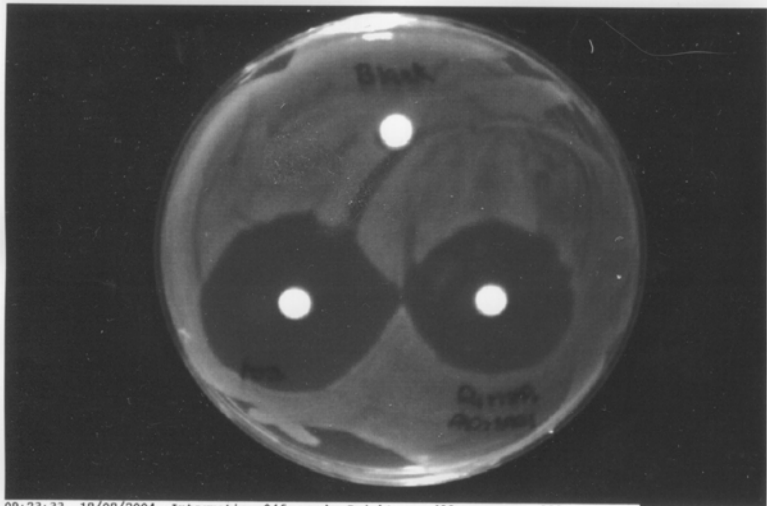

09:23:33, 18/08/2004, Integration=0(frames), Brightness 499, Contrast 999. Original

Supplement: pnas_0504314102_1.pdf [file pnas_0504314102_1.pdf]

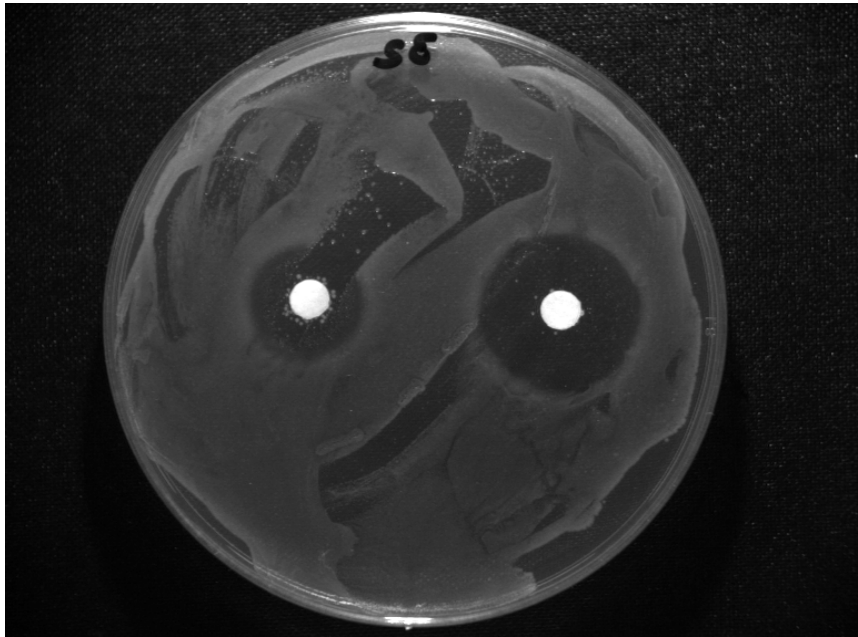

Supplement: pnas_0504314102_10.pdf [file pnas_0504314102_10.pdf]

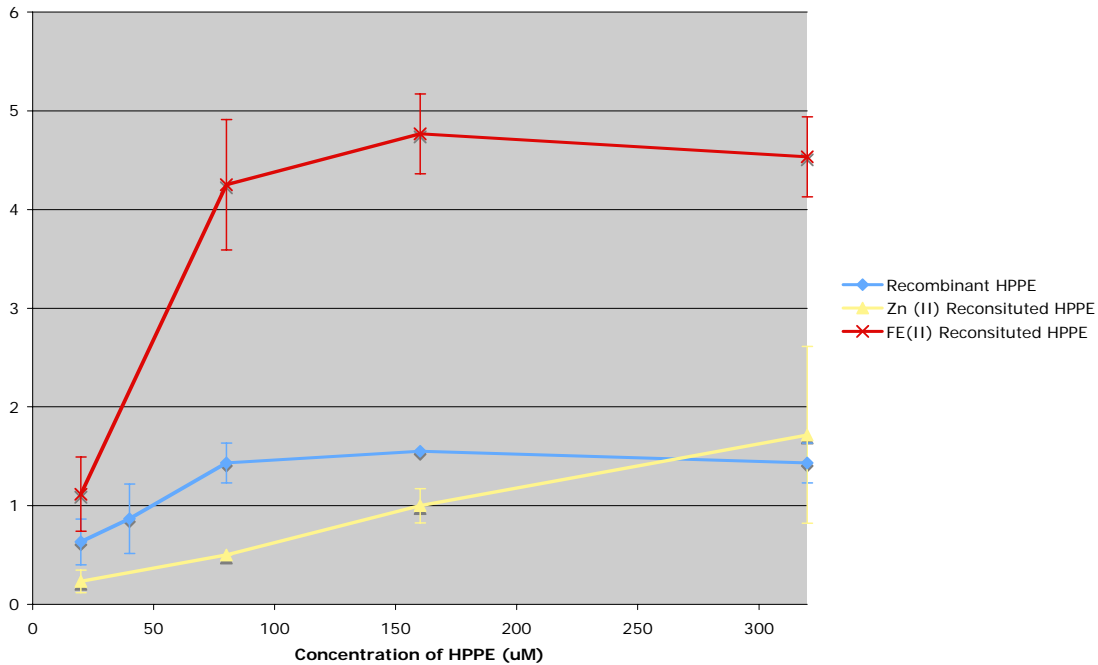

Supplement: pnas_0504314102_11.pdf [file pnas_0504314102_11.pdf]

Time (min)

-10 0 10 20 30 40 50 60 70

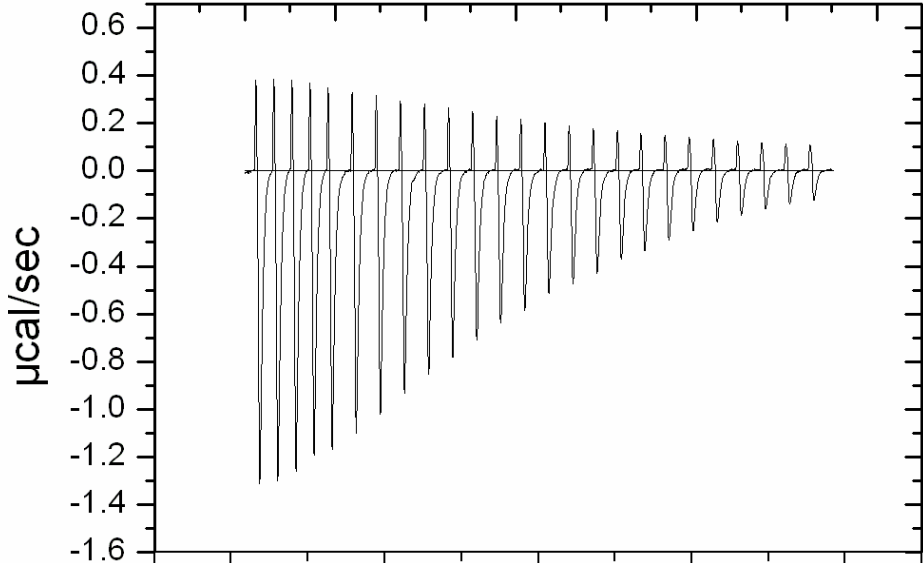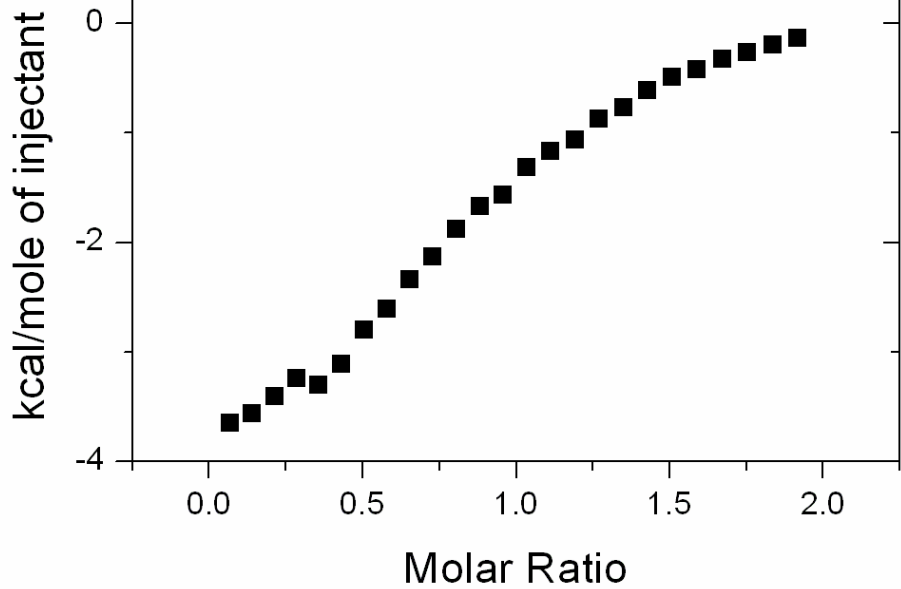

Supplement: pnas_0504314102_12.pdf [file pnas_0504314102_12.pdf]

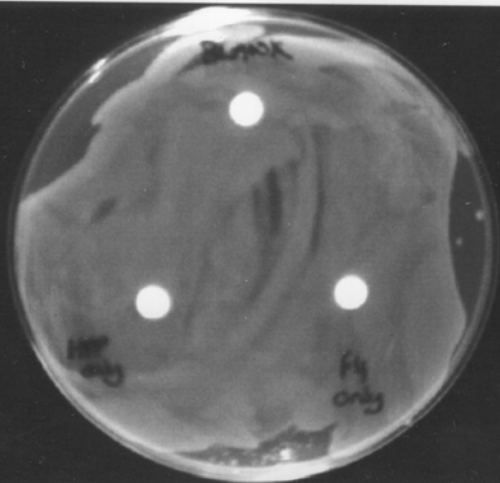

09:28:18, 18/08/2004, Integration=0(frames), Brightness 499, Contrast 999, Original

Supplement: pnas_0504314102_2.pdf [file pnas_0504314102_2.pdf]

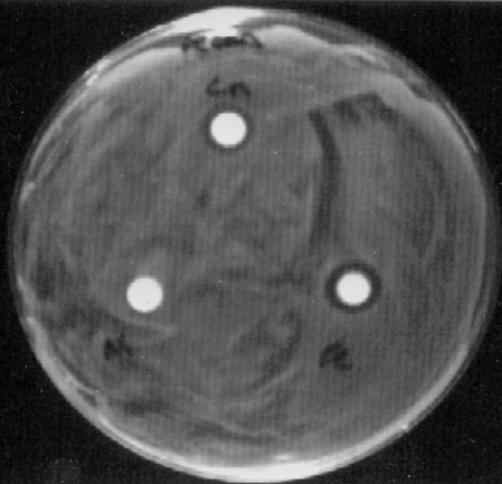

Supplement: pnas_0504314102_5.pdf [file pnas_0504314102_5.pdf]

# Zone of Inhibition to Fosfomycin

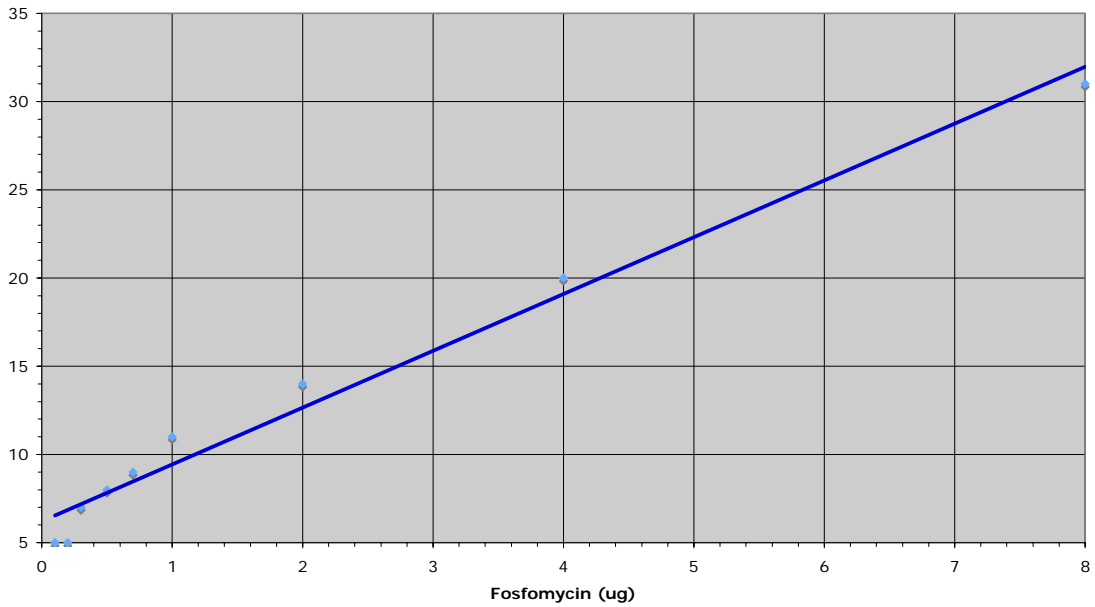

Supplement: pnas_0504314102_6.pdf [file pnas_0504314102_6.pdf]

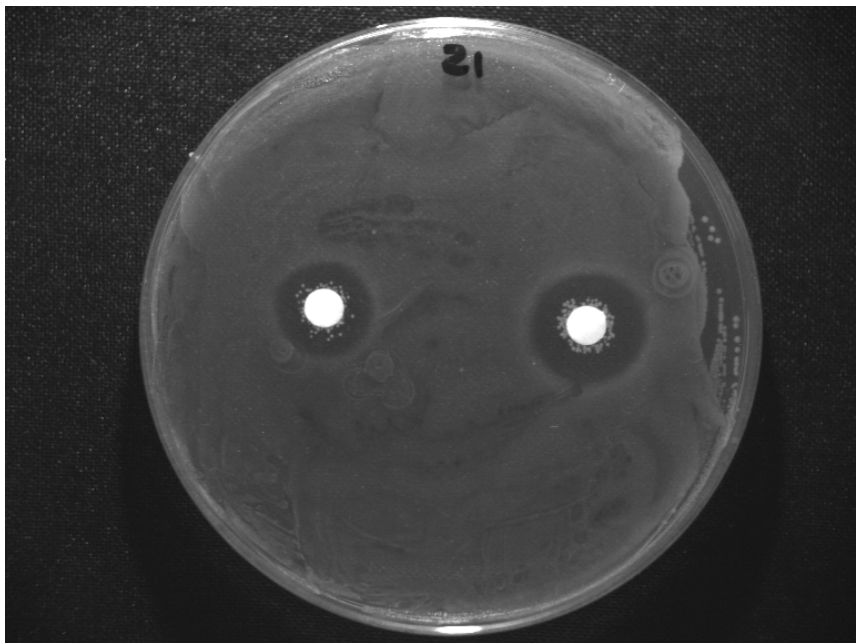

Supplement: pnas_0504314102_9.pdf [file pnas_0504314102_9.pdf]
